# Supplementary material
Source: publisher site journal article supplement (https://www.spandidos-publications.com/1811/downloadSupplementary)

Figure S1. Expression levels of estrogen, progesterone and prolactin in EM and normal tissues. Both the estrogen level and the ratio of estrogen/progesterone were significantly decreased in EM tissues compared with those in control tissues, whereas there was no significant difference in progesterone or prolactin between EM and control tissues. Data are presented as the mean  $\pm$  SEM. \* $P < 0.05$ . EM, endometriosis.

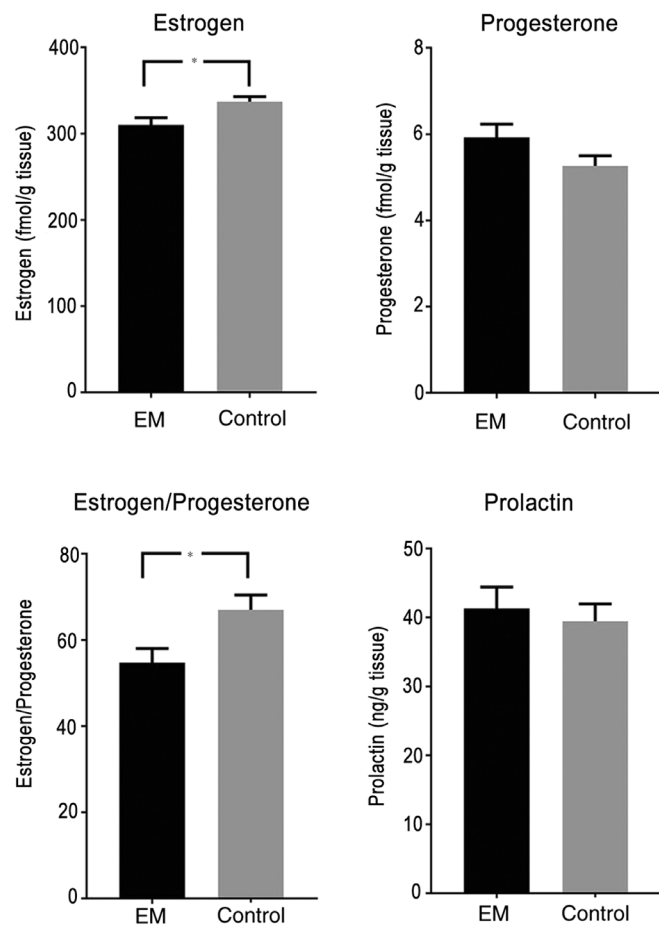

Figure S2. TPCA-1 inhibits cell viability and migration, and induces apoptosis in ESCs *in vitro*. ESCs were treated with TPCA-1 (selective inhibitor of I $\kappa$ B kinase  $\beta$ ) or DMSO (control) for 72 h *in vitro*, and cell migration, viability and apoptosis were analyzed. (A) Wound healing assay was performed, and images were acquired using light microscopy (magnification, 100 $\times$ ). TPCA-1 significantly inhibited cell migration compared with that of the control. (B) Cell proliferation assay, TPCA-1 inhibited cell proliferation compared with that of the control. (C) Cell apoptosis assay, following treatment for 72 h *in vitro*, ESCs were collected, stained with annexin-V and PI, and analyzed by flow cytometry. The number of apoptotic cells (annexin V-positive cells) was determined as the percentage of gated cells at upper-right and lower-right quadrants. Representative images and relative quantifications are shown. The data demonstrated that TPCA-1 reduced the viability and migration of cells, whilst increasing the apoptotic index of cells compared with the values exhibited by the control. All experiments were performed in triplicate and data are presented as the mean  $\pm$  SEM. \* $P$ <0.05, \*\* $P$ <0.01. ESCs, endometrial stromal cells; PI, propidium iodide.

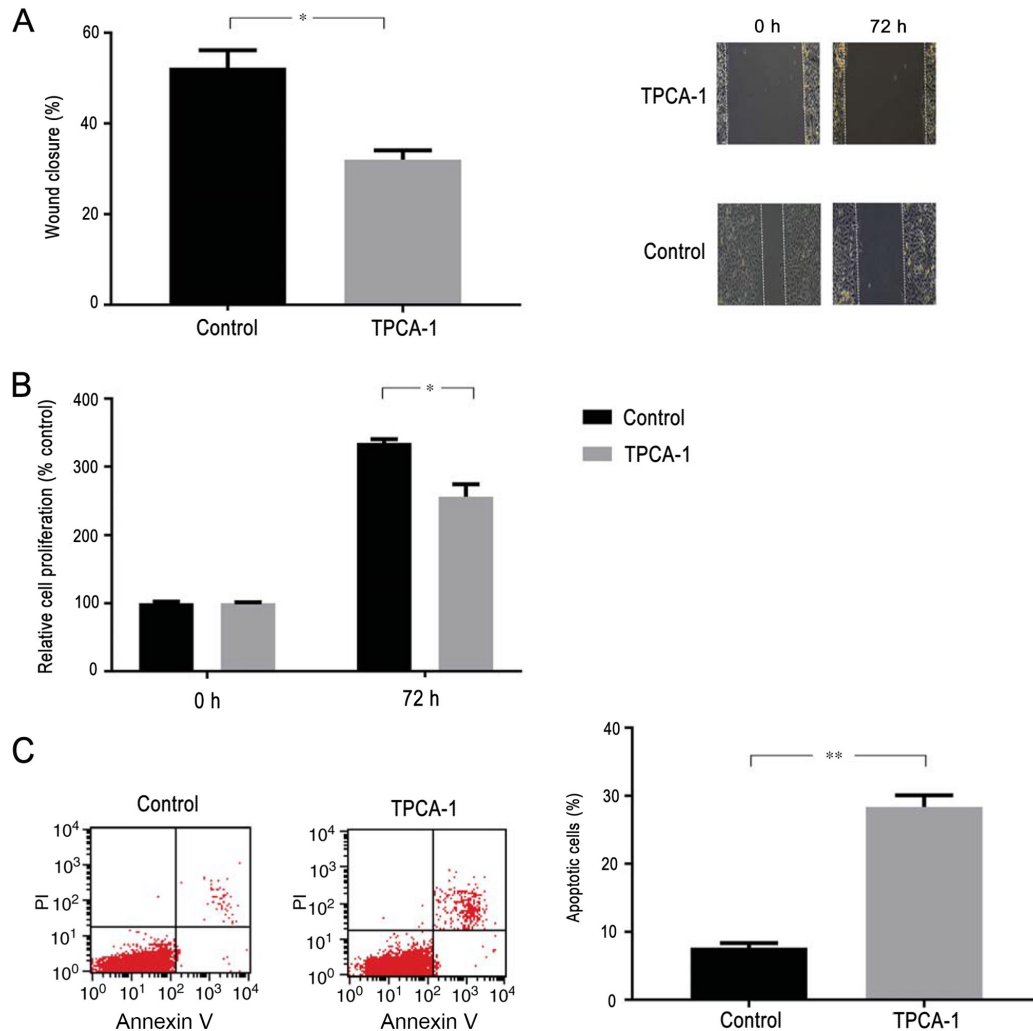

Supplement: Supplementary file 1 [file downloadSupplementary]
